# Supplementary material for: Immune Cell Profiling in the Ovarian Stroma of a Viviparous Fish during the Breeding Season: A Histological and Immunohistochemical Investigation
Source: MDPI journal article supplement (doi:10.3390/fishes9010010), 2023-12-25
Supplement: s1 [file s1]

# Immune Cell Profiling in the Ovarian Stroma of a Viviparous Fish during the Breeding Season: A Histological and Immunohistochemical Investigation

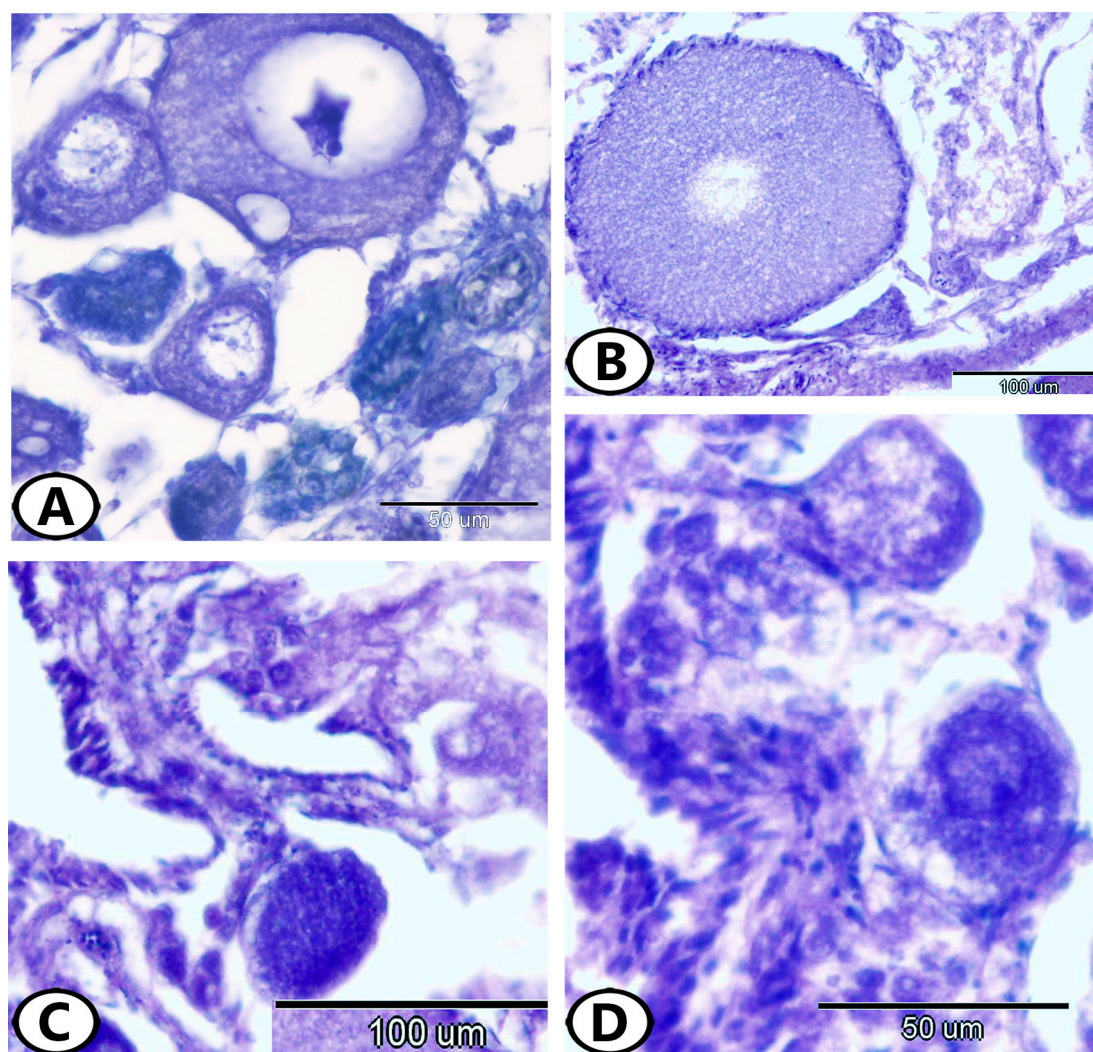

**Figure S1.** (A–D) Negative controls of the ovarian tissues of the Molly fish, where (A) NF- $\kappa$ B, (B) SOX9, (C) myostatin, and (D) Nrf2 primary antibodies were omitted, and the tissue specimens were incubated with blocking buffer.



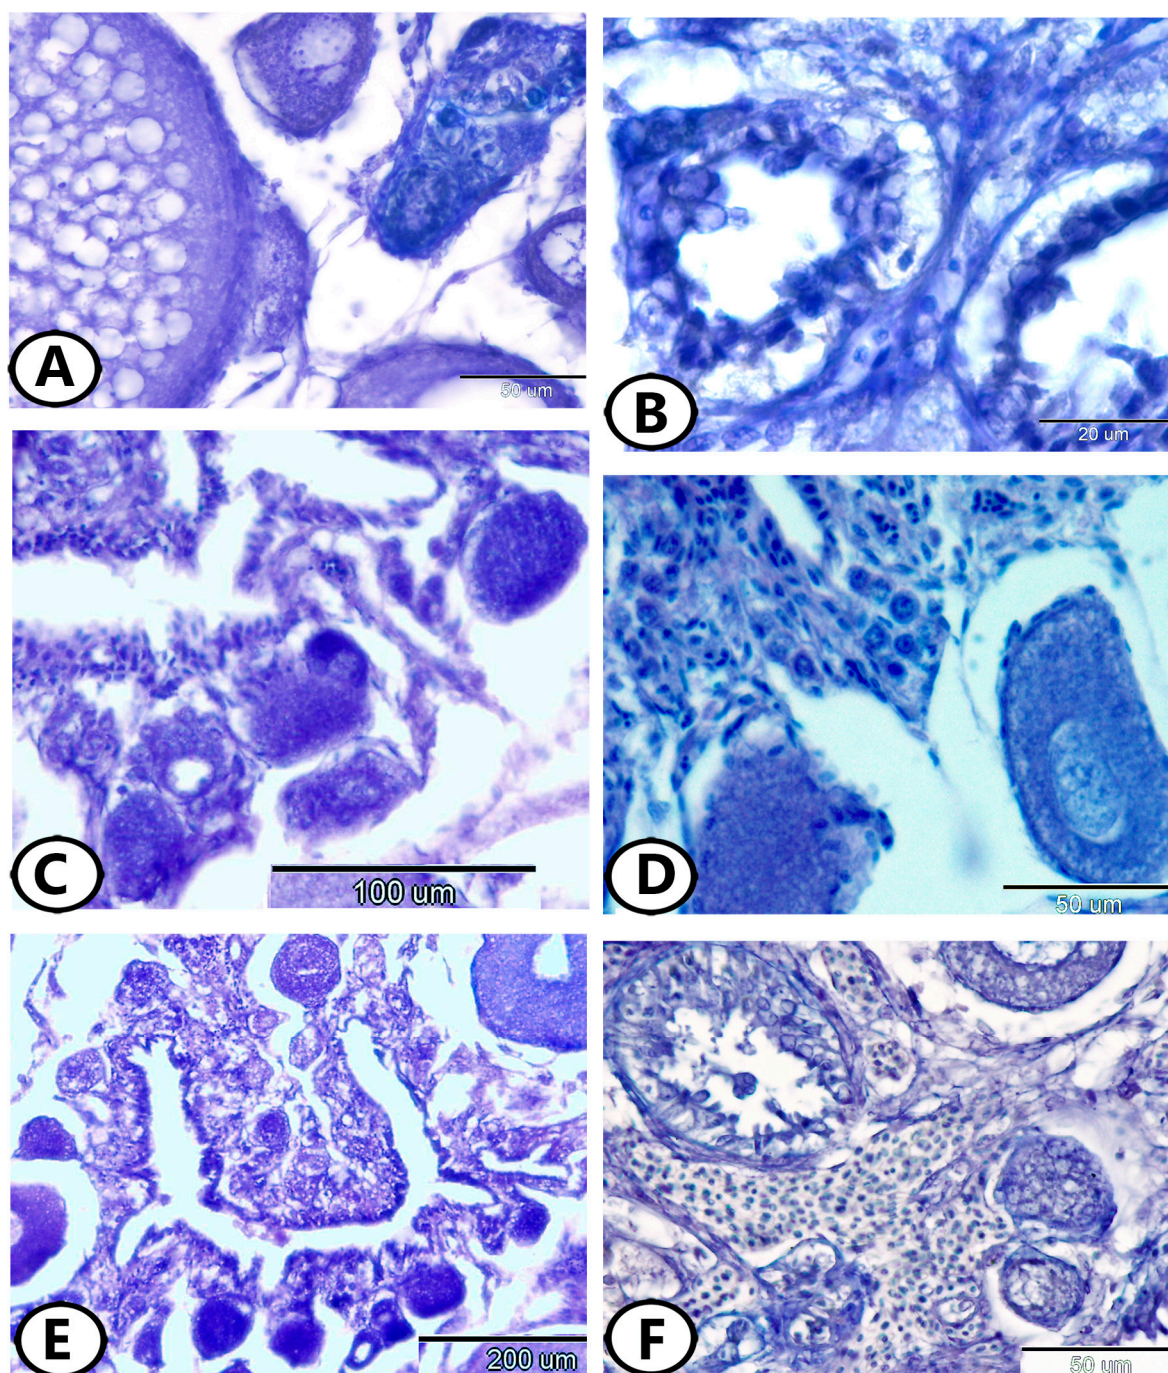

**Figure S2.** (A-F) Negative controls of the ovarian tissues of the Molly fish where (A) APG5, (B) TGF, (C) S100, (D) CD68, (E) IBA, and (F) IL-1 $\beta$  primary antibodies were omitted and the tissue specimens were incubated with blocking buffer.
