# Supplementary material for: Immune Cell Profiling in the Ovarian Stroma of a Viviparous Fish during the Breeding Season: A Histological and Immunohistochemical Investigation
Source: MDPI journal article supplement (doi:10.3390/fishes9010010), 2023-12-25
Supplement: s1 [file s1]

Archive with 1 entries (1 files):
- fishes-2763254-supplementary.pdf
